# Supplementary figures and images for: Temporal and spatial topography of cell proliferation in cancer
Source: Research Square preprint supplement (doi:10.21203/rs.3.rs-584748/v1), 2021-06-12

# Extended Data Figure 6

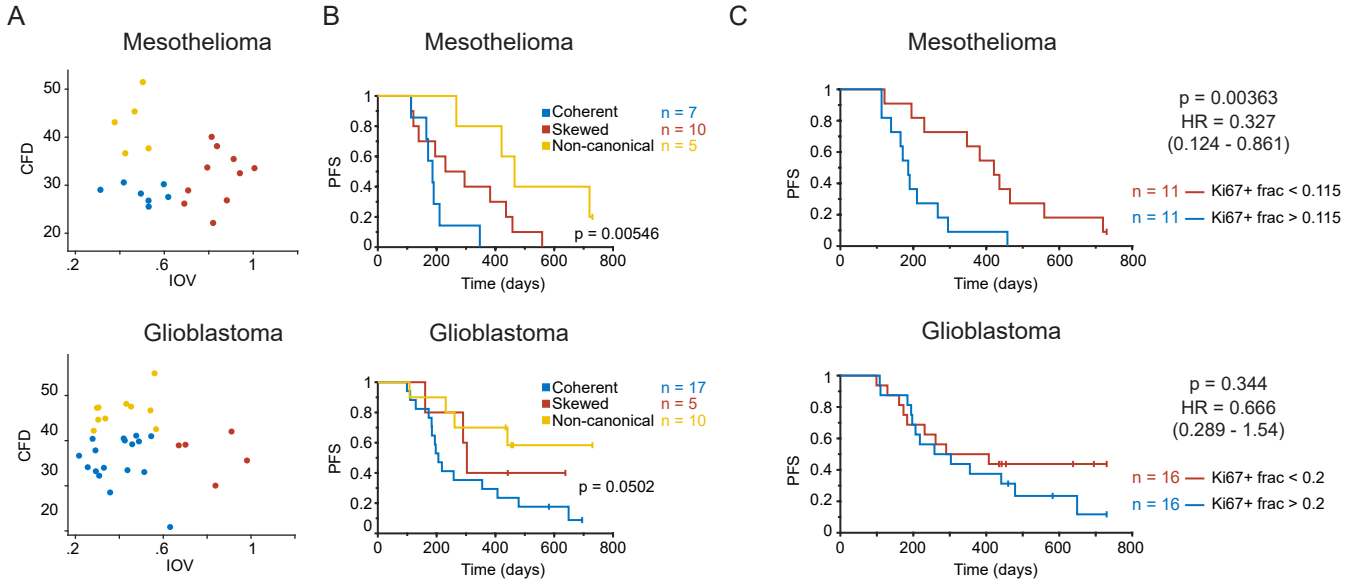

Supplement: Supplementary file 1 [file 0c01eea628825bd70da5c985.pdf]

# Extended Data Figure 5

A

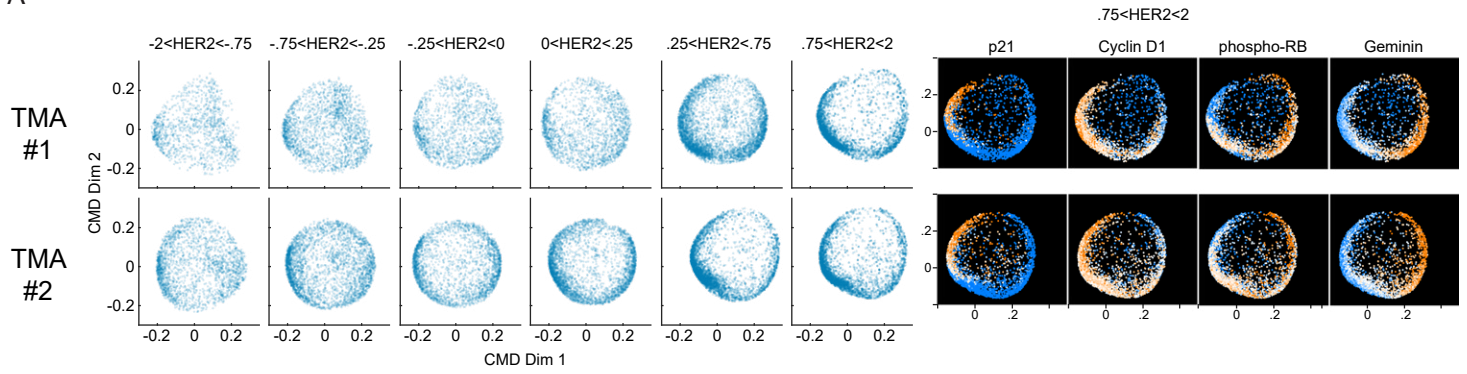

B

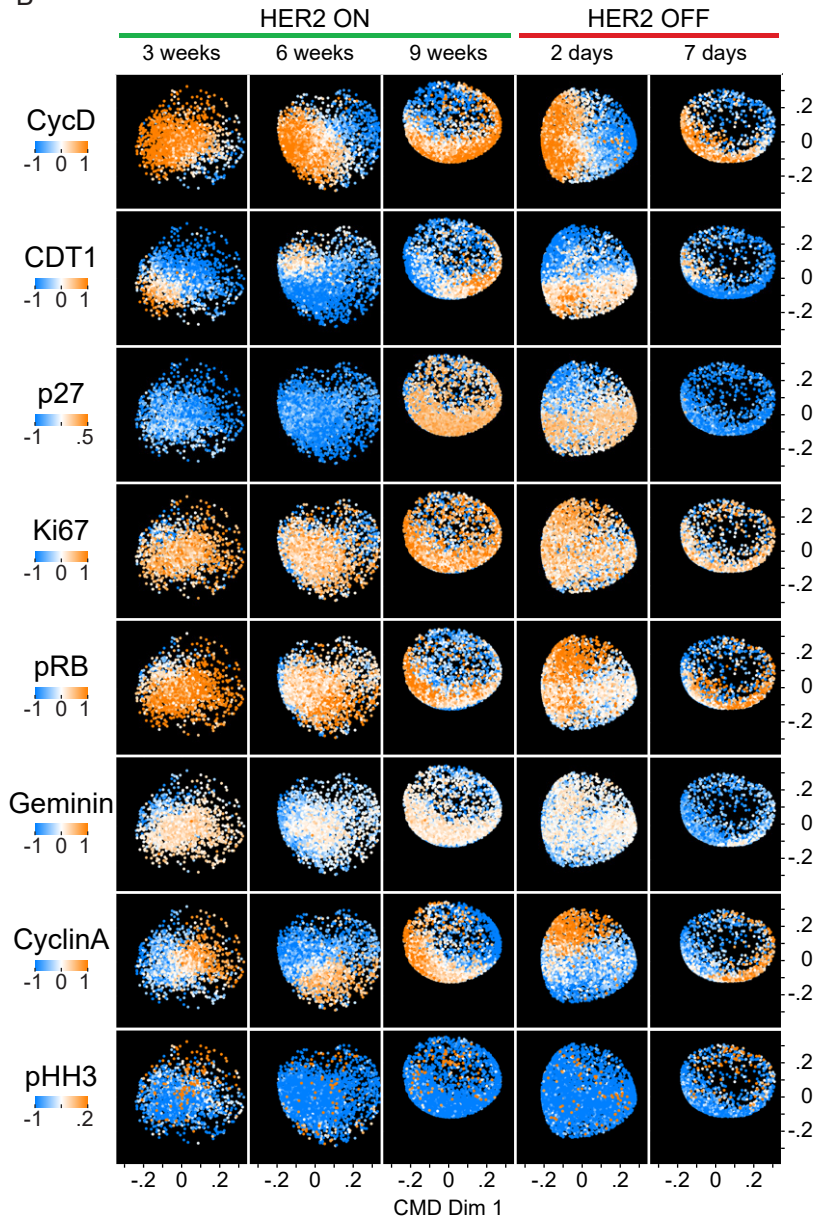

C

Circle Fit Dist (CFD)

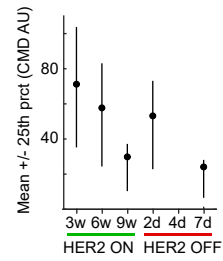

Supplement: Supplementary file 2 [file 0dd300779675274c76337dde.pdf]

# Extended Data Figure 1

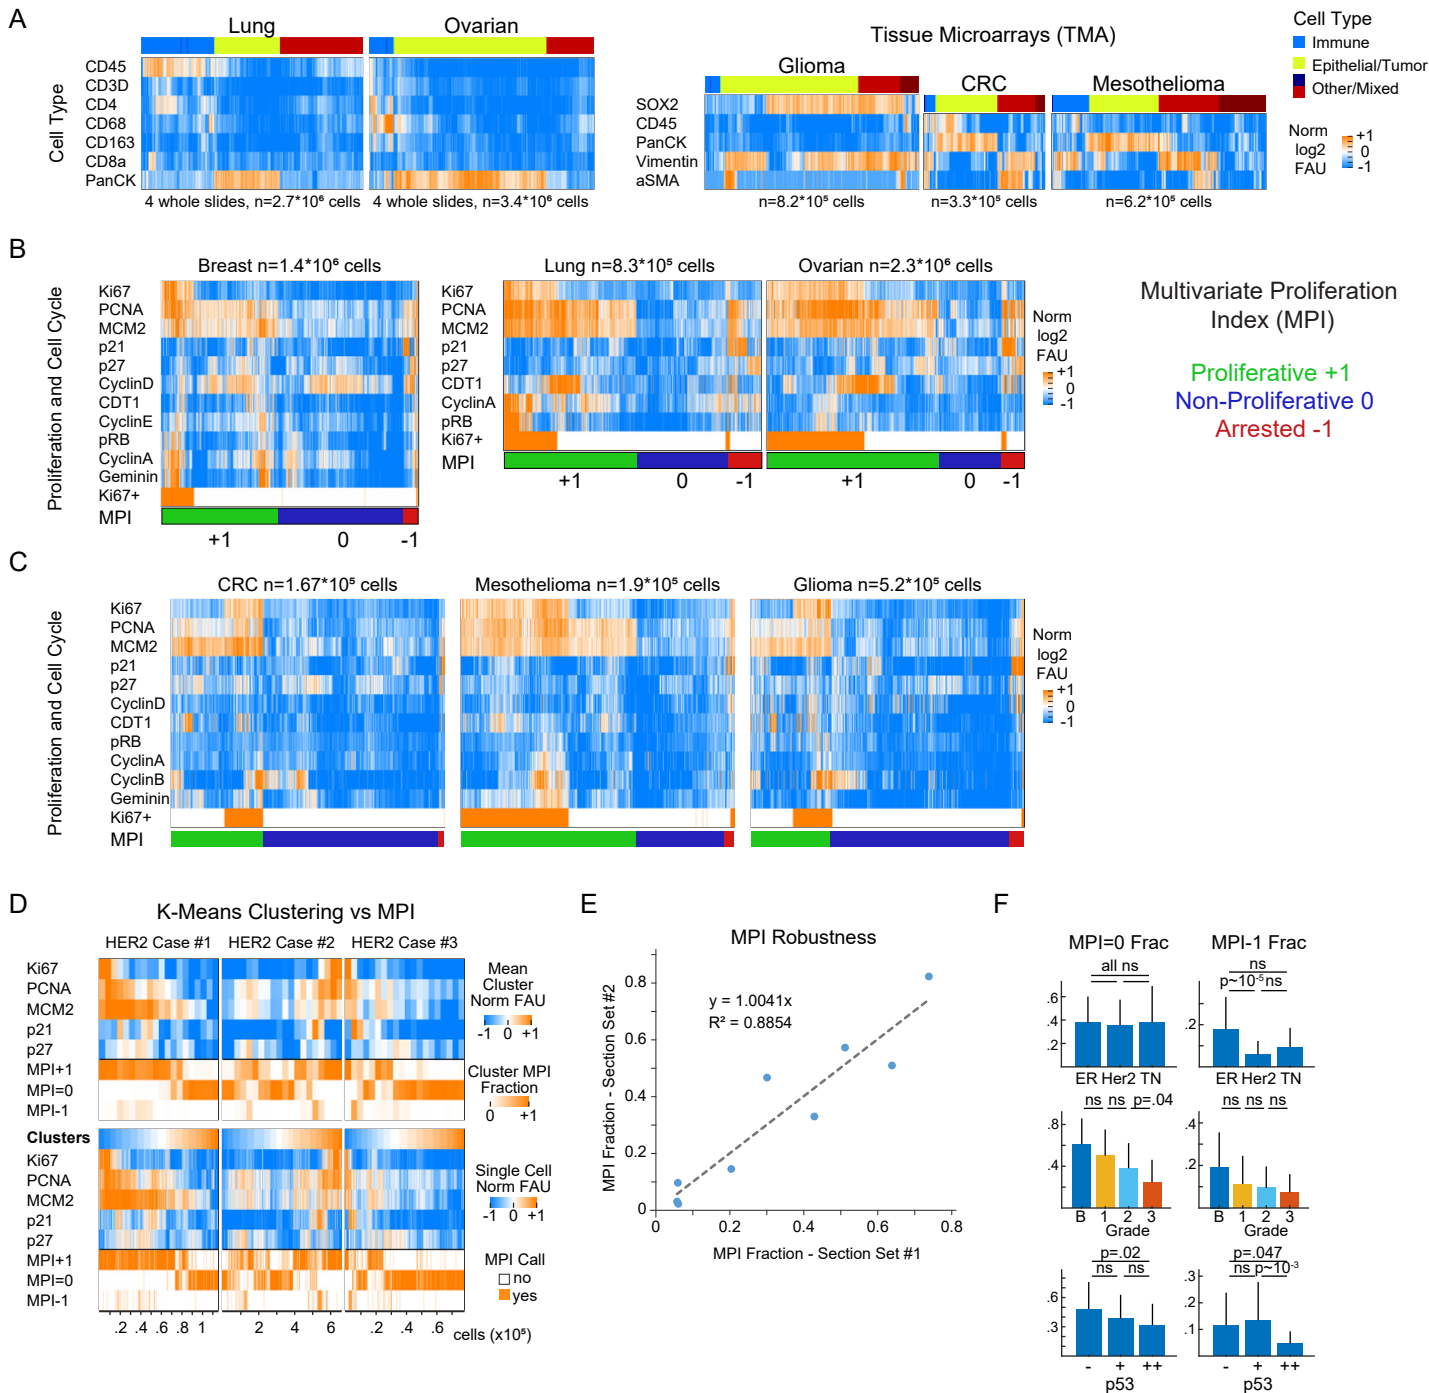

Supplement: Supplementary file 3 [file 211d11dd148d7c1686441173.pdf]

# Extended Data Figure 4

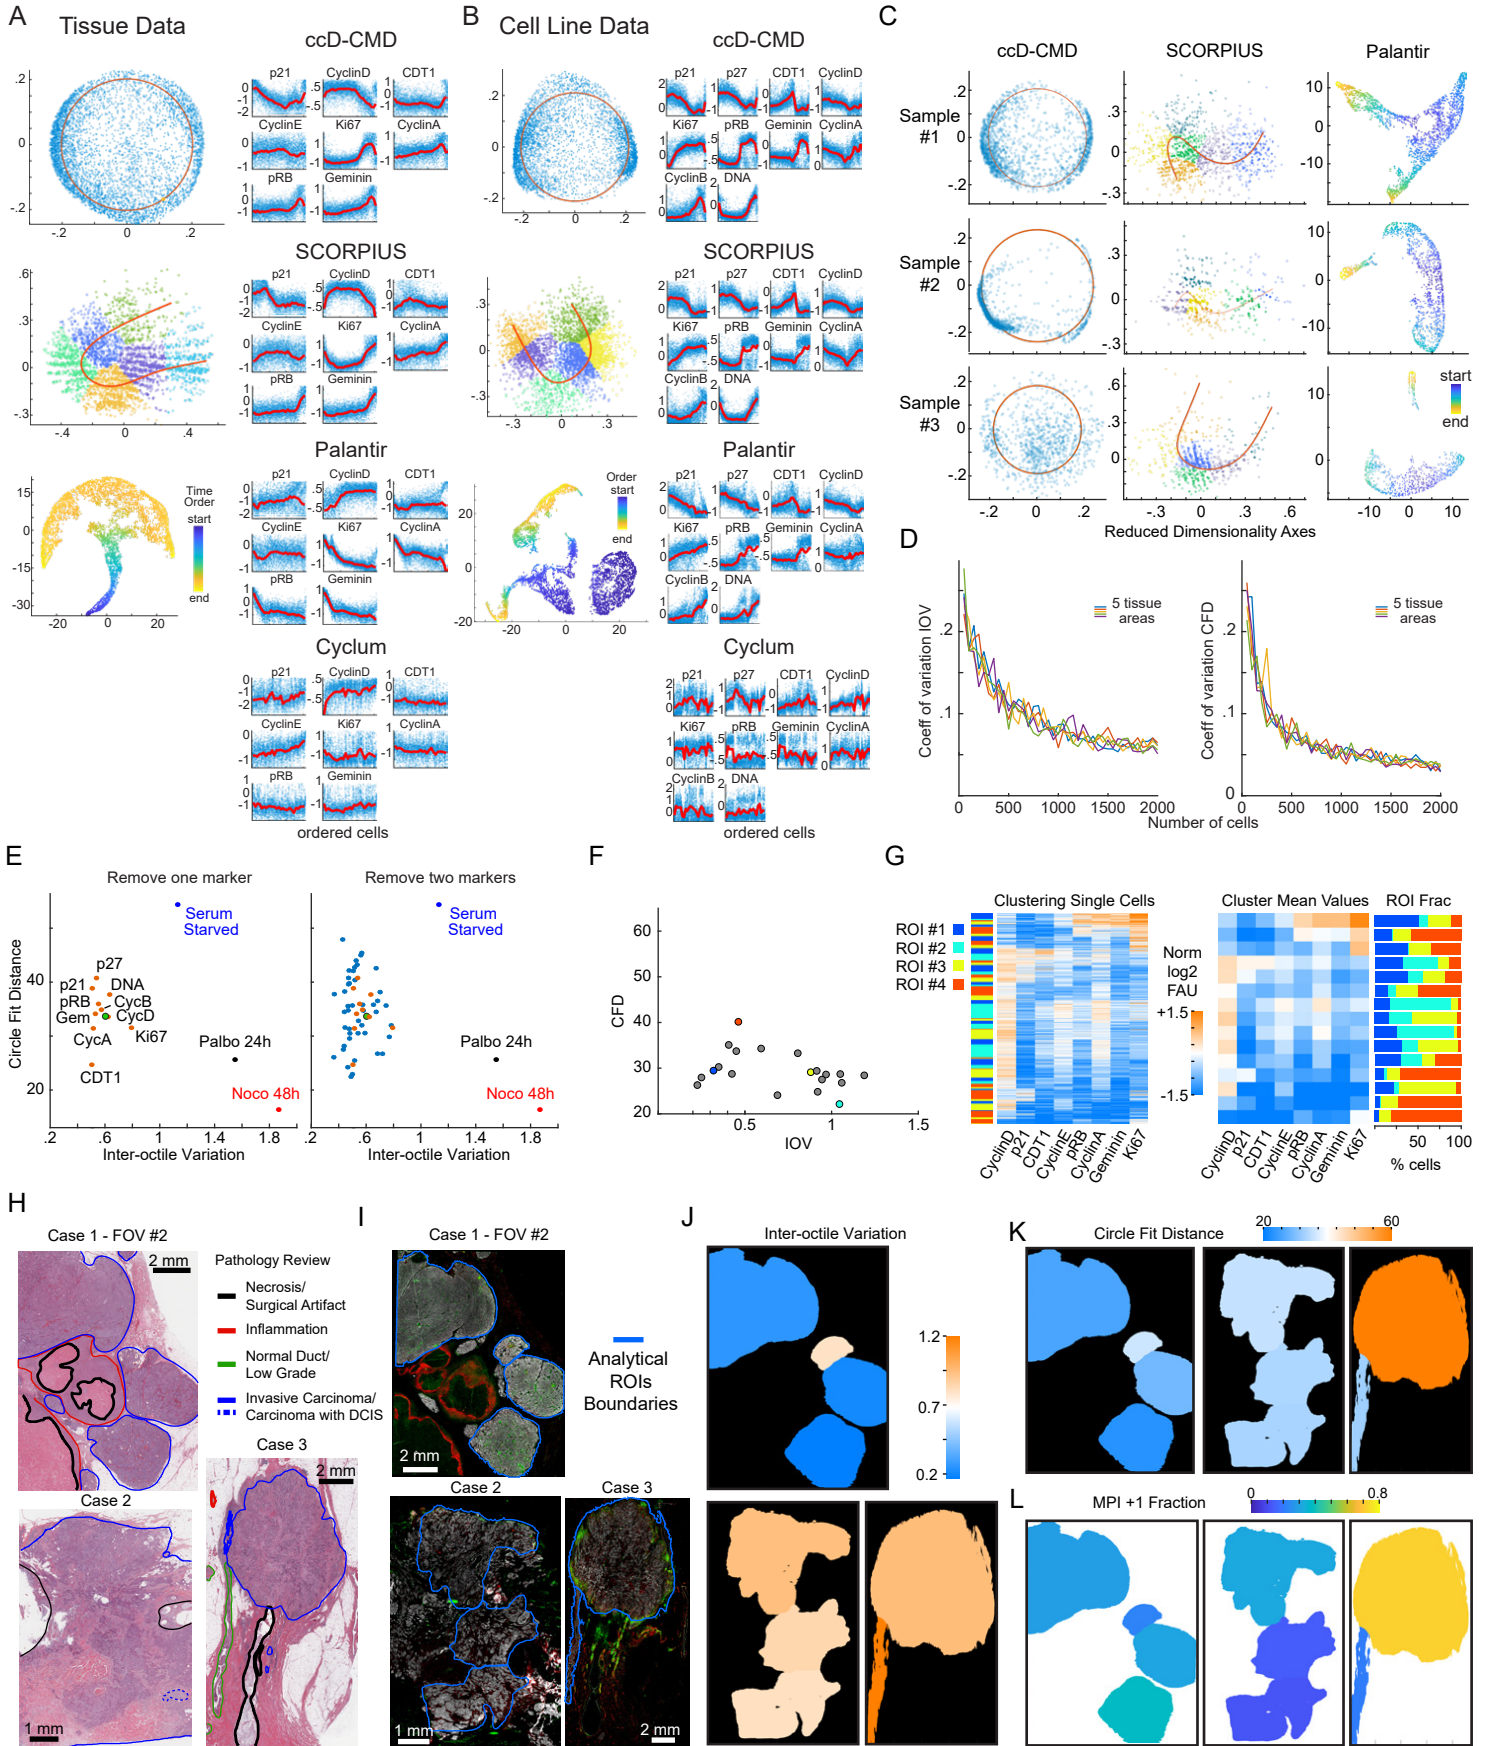

Supplement: Supplementary file 4 [file 6a4f348f211cd236cde17f80.pdf]

# Extended Data Figure 3

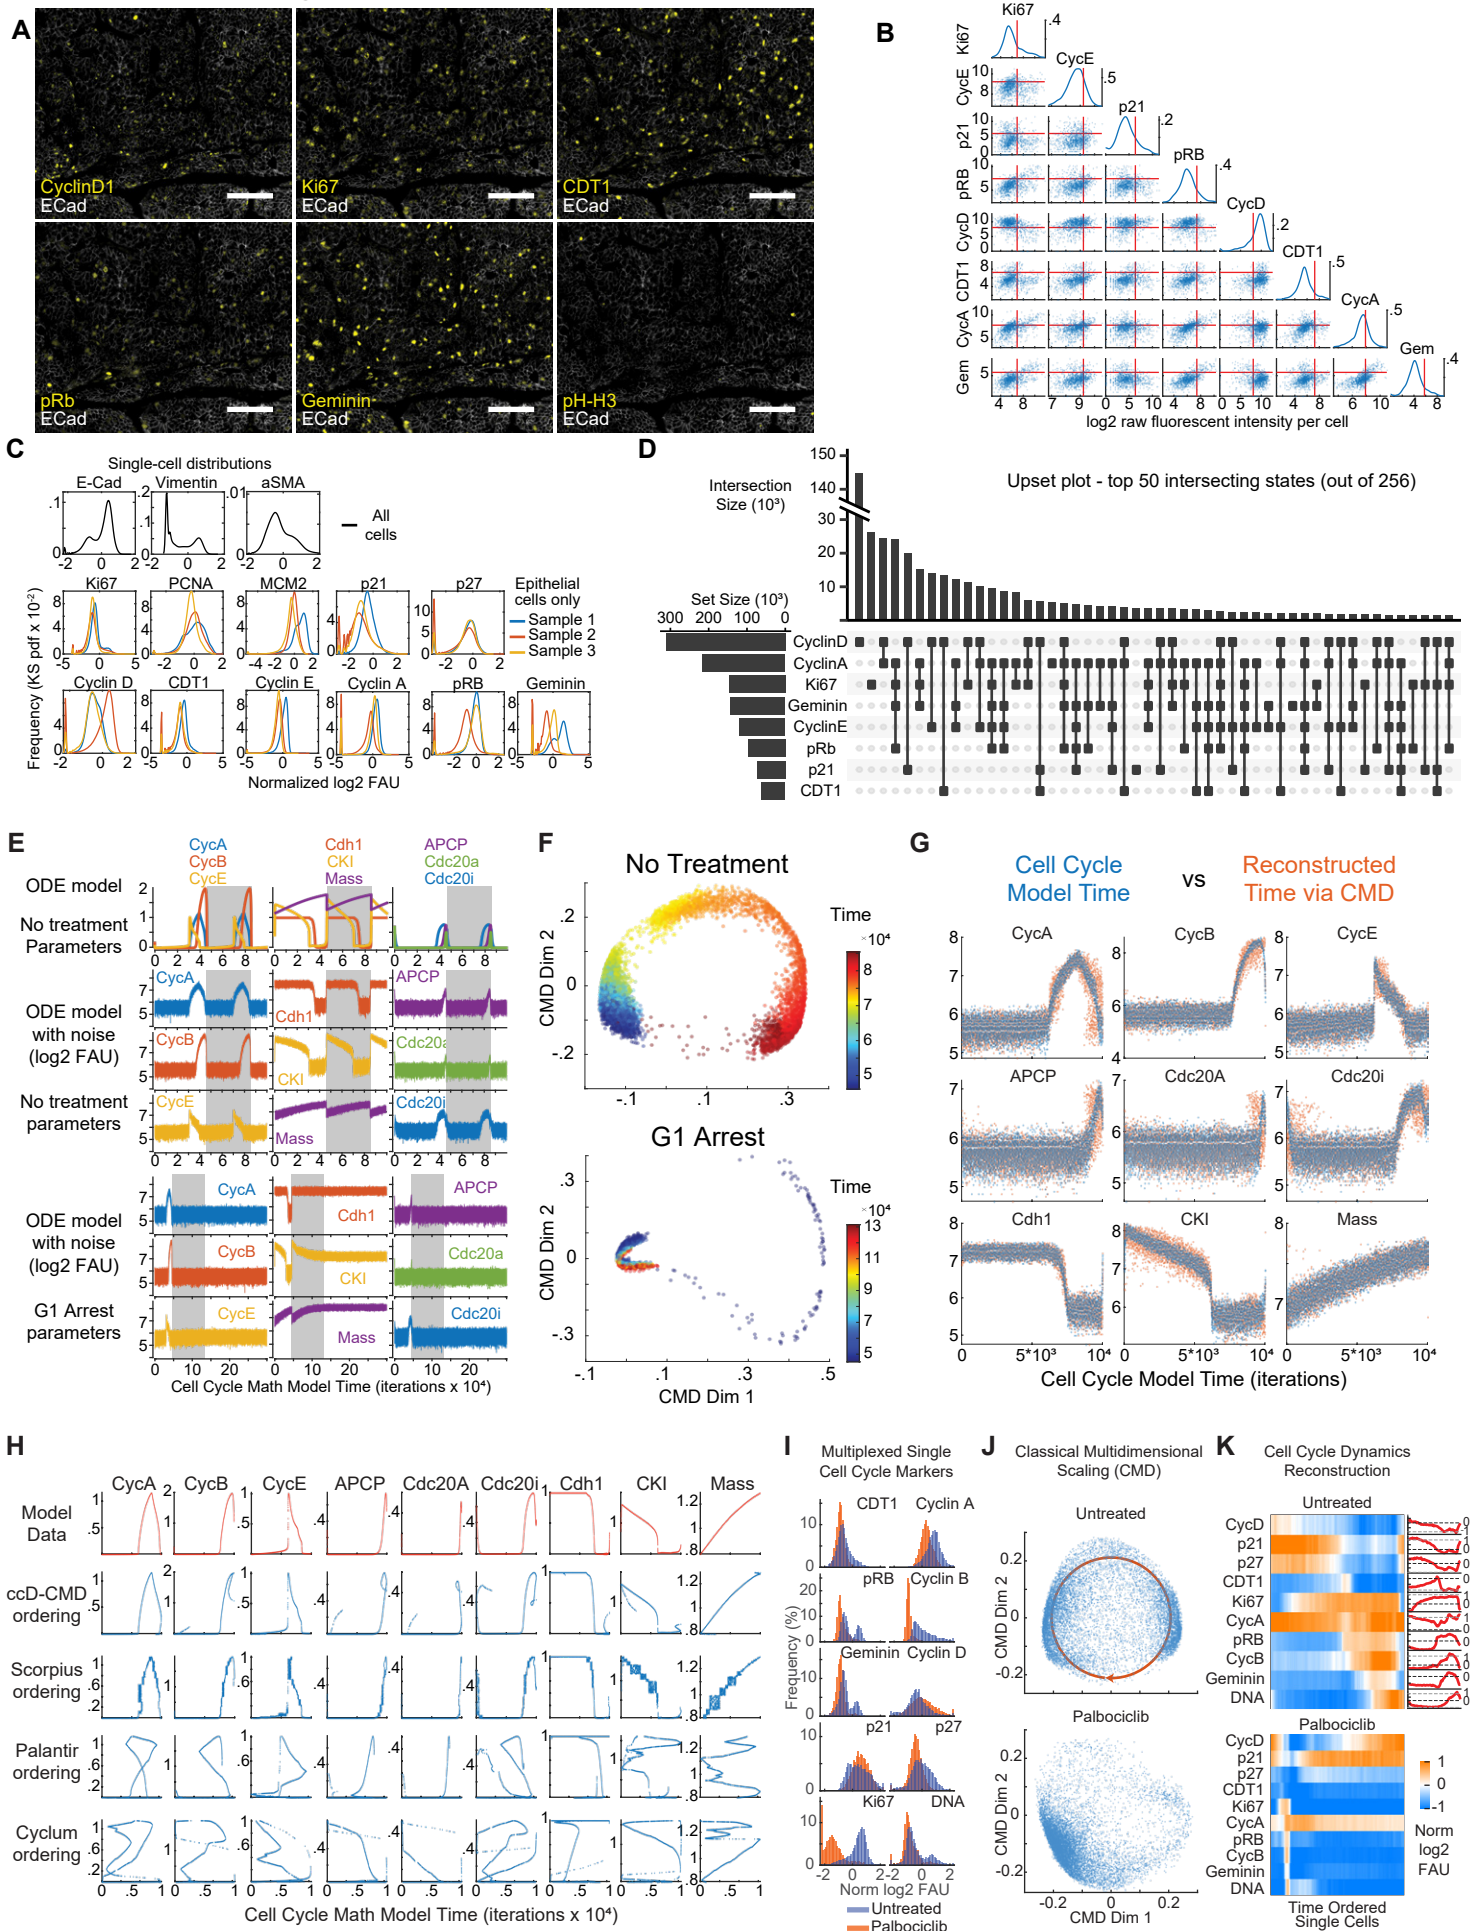

Supplement: Supplementary file 5 [file 8a7cbd3badab6c6ac2df3c67.pdf]

# Extended Data Figure 2

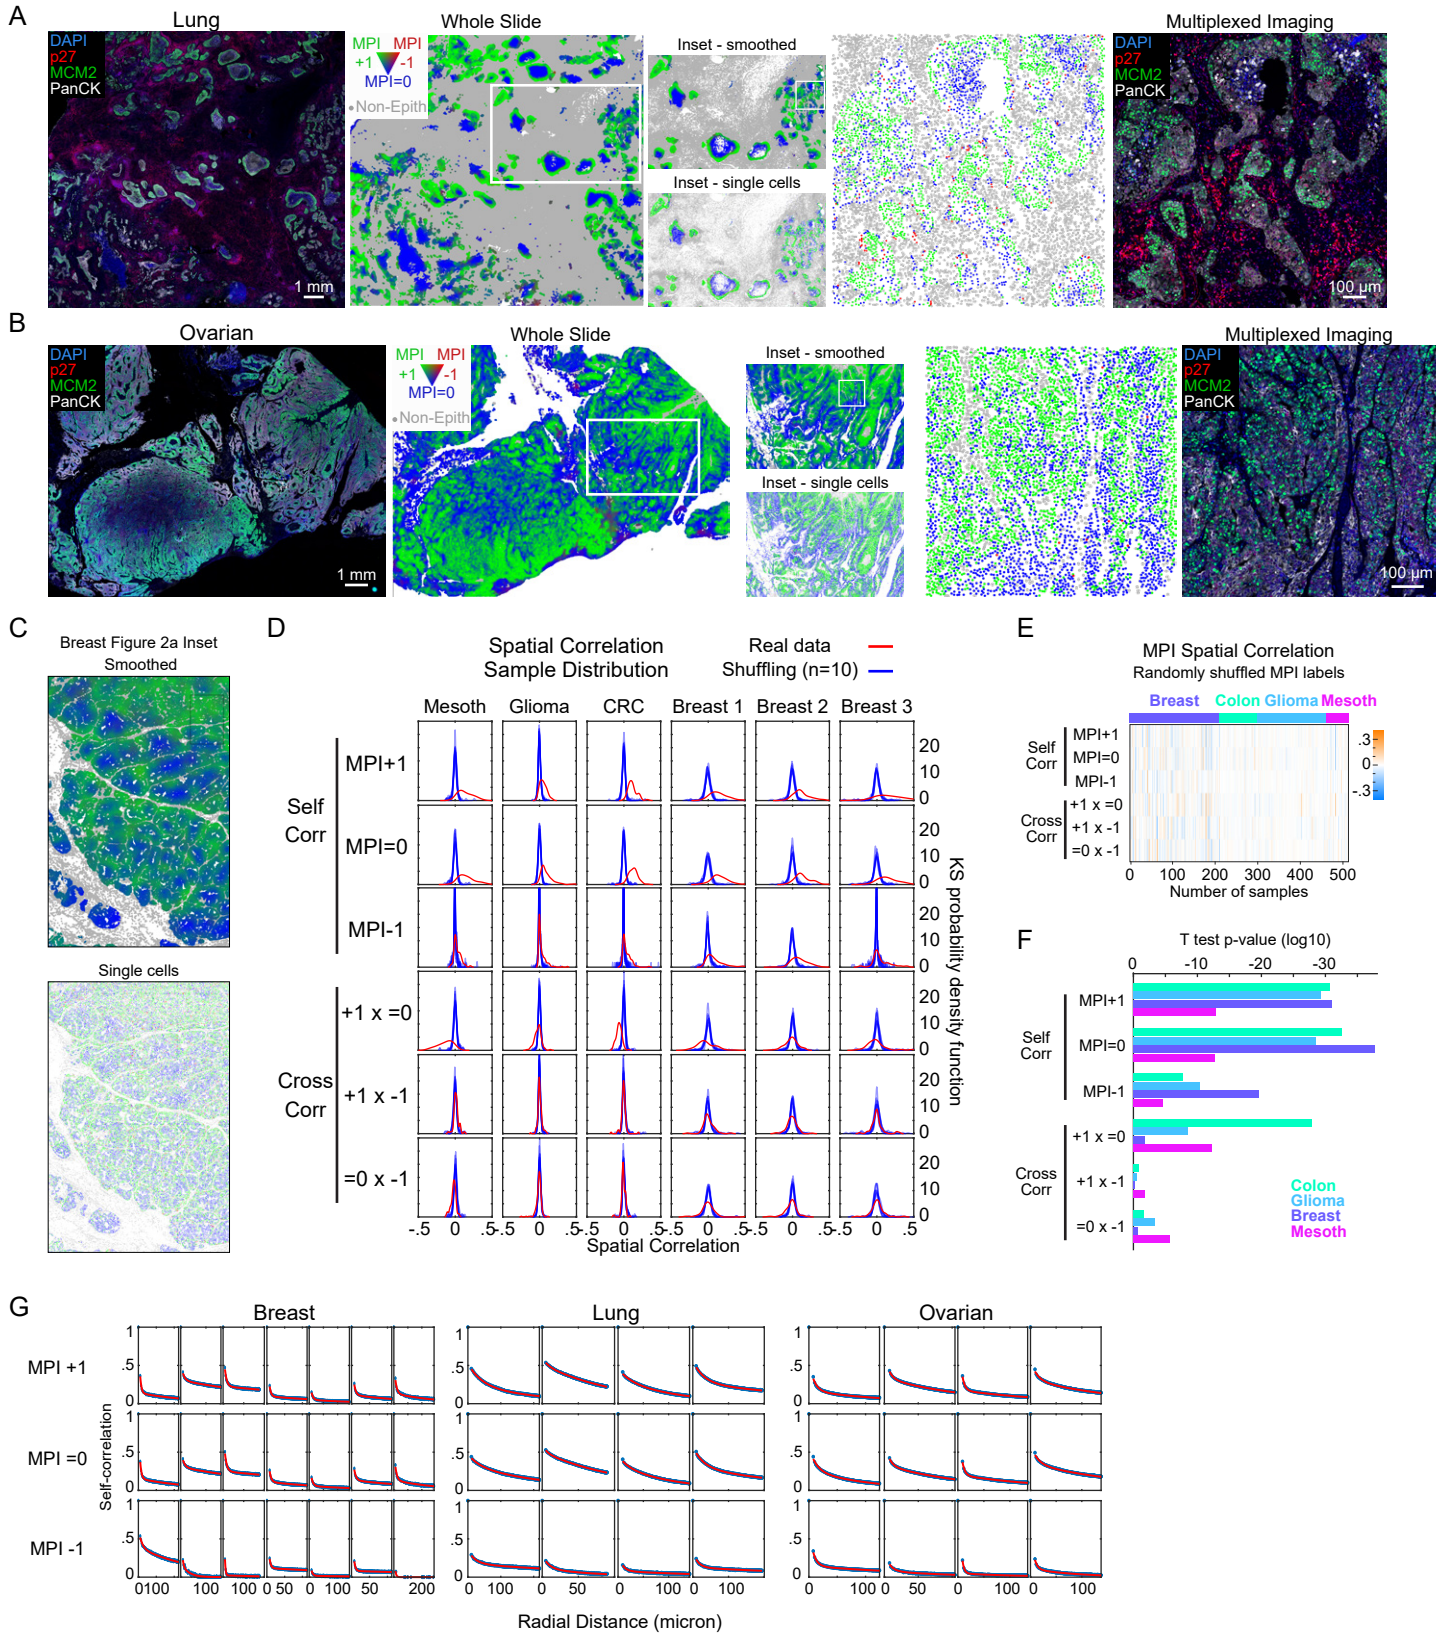

Supplement: Supplementary file 6 [file d43527c87277241926ce2b3f.pdf]

# Extended Data Figure 7

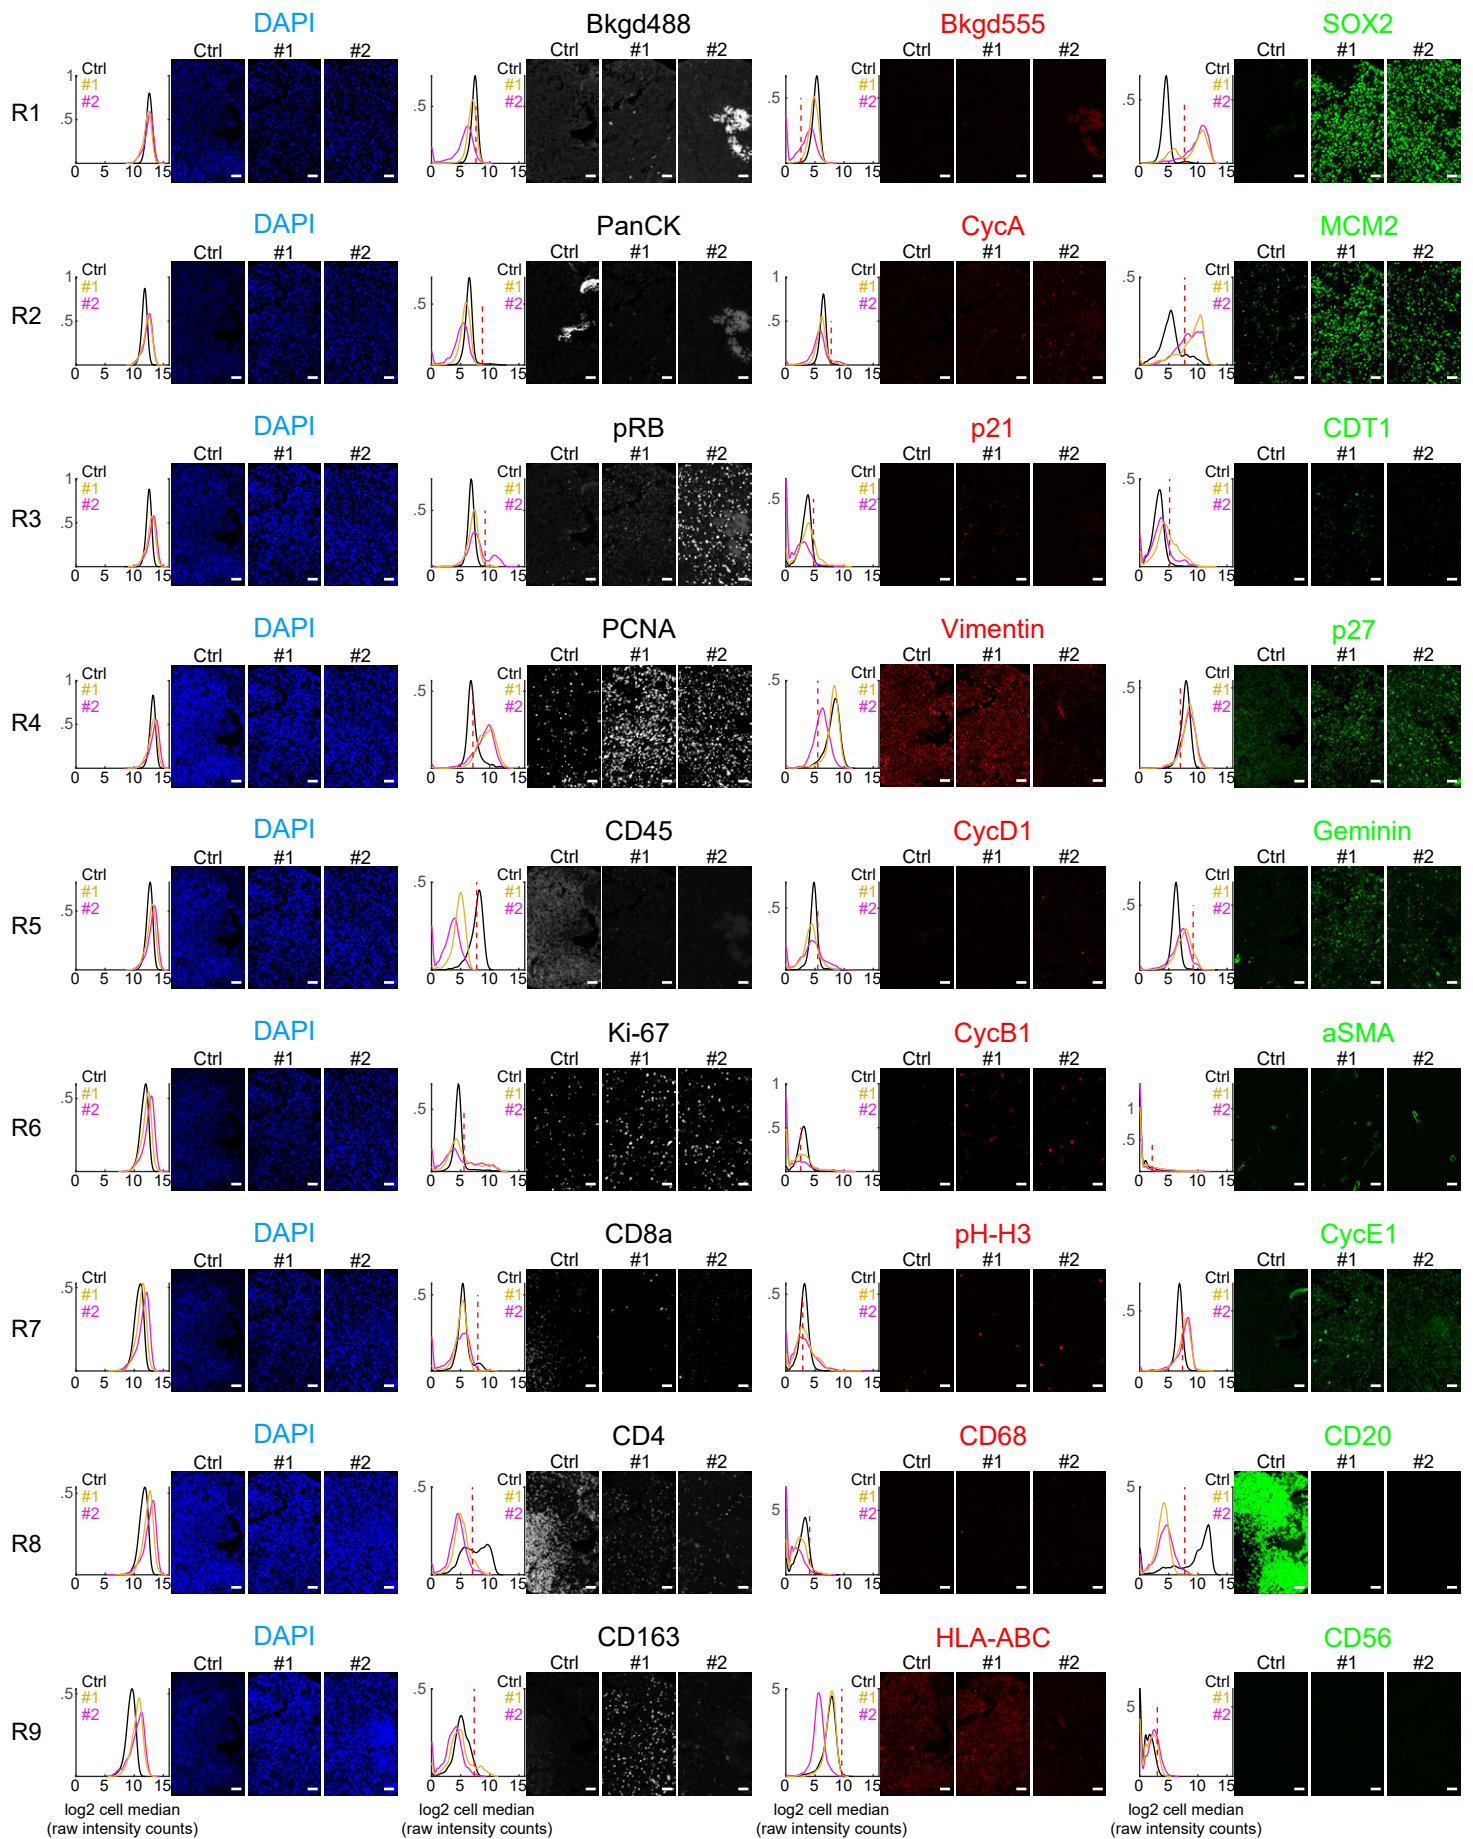

Supplement: Supplementary file 7 [file e890de2a34b9ca6b33066583.pdf]
